# Supplementary material
Source: PubMed Central journal article supplement (PMC3419139)
Supplement: NIHMS396975-supplement-1_si_001.pdf [file NIHMS396975-supplement-1_si_001.pdf]

**Supporting Information for:**

## **Mode Recognition in UV Resonance Raman Spectra of Imidazole: Histidine Monitoring in Proteins**

Gurusamy Balakrishnan, Andrzej A. Jarzecki, Qiang Wu, Pawel M. Kozlowski, Daojing Wang, and Thomas G. Spiro\*

*<sup>1</sup>Department of Chemistry, Princeton University, Princeton, Princeton, NJ 08544, USA.*

### **Pre-resonant Raman Experiment at 488 nm:**

Imidazole (ImH) and <sup>15</sup>N labeled (at both nitrogens) ImH were obtained from Aldrich and used as received. ImH with deuterium labeled at C<sub>2</sub> was prepared<sup>1</sup> by refluxing ImH in D<sub>2</sub>O for 12 hrs at 60 °C. Then purified by repeated re-crystallization. Raman spectrum did not show bands that corresponding to native ImH and thus confirms that isotope exchange was complete. ImH (0.5 M) in 3M aqueous HCl solution were excited with 488 nm (CW Ar<sup>+</sup> ion laser, 40 mW) to obtain pre-resonance Raman spectra of Imidazolium cation (ImH<sup>2+</sup>). Similarly, 0.5 M solutions of ImH in pH 7.4 phosphate buffer for neutral and 3 M aqueous NaOH for imidazolate (Im<sup>-</sup>) anion were used. Appropriate solvent backgrounds were subtracted for all spectra. In 3M NaOH, some neutral ImH remains, and the relevant bands were subtracted out using the ImH spectrum. Sample solutions were spun in a NMR tube during the Raman measurements. Back scattering (135 °C) geometry was used to collect the Raman spectra and dispersed in a triplemate (SPEX 1877) equipped with 1200 grooves/mm grating at the spectrometer stage. Raman signals were collected using intensified photodiode array (IRY1024, PI) as the multichannel detector. Two spectral windows were spliced to get the full spectrum, using a band with strong intensity that appears in both windows to normalize the spectrum. Raman bands from cyclohexane were used as the standard for wavenumber calibration.

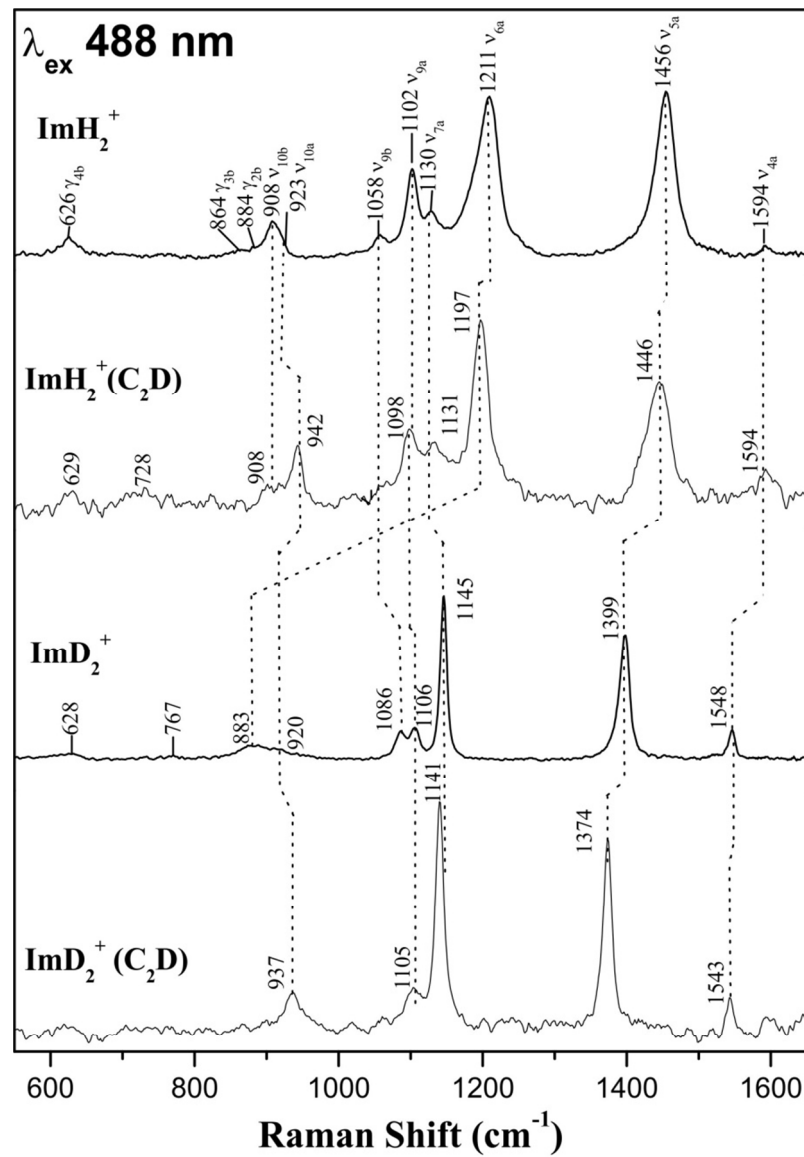

**Figure S1.** Pre-resonance Raman spectra excited at 488 nm for the indicated species in aqueous solution. Mode assignments and experimental frequencies are labeled.

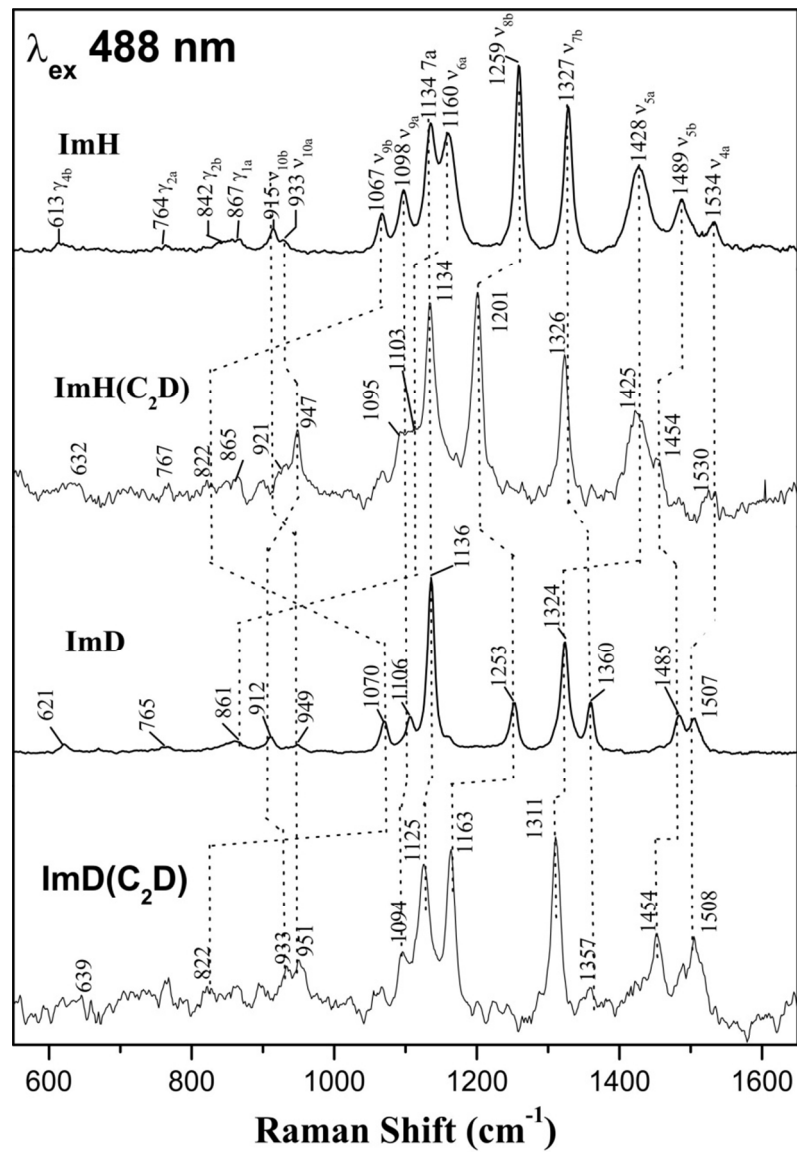

**Figure S2.** Pre-resonance Raman spectra excited at 488 nm for the indicated species in aqueous solution. Mode assignments and experimental frequencies are labeled.

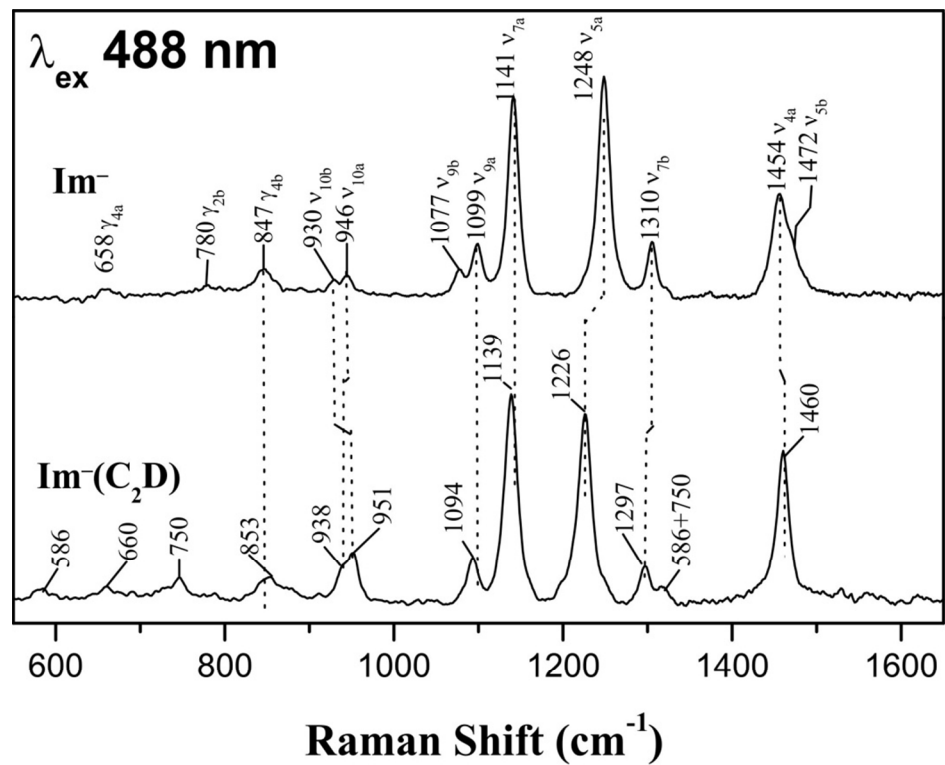

**Figure S3.** Pre-resonance Raman spectra excited at 488 nm for the indicated species in aqueous solution. Mode assignments and experimental frequencies are labeled.

**Table S1.** Optimized bond lengths (Å) of the indicated molecules using the B3LYP hybrid functional with a 6-31 G\* basis set. Available experimental data are shown for comparison.

| Parameter                                          | Protonated                    |                                                                  |                                                                    |                    | Neutral |                                        |                                                       |                                                       |                    | Deprotonated    |                                                                  |                                                      |
|----------------------------------------------------|-------------------------------|------------------------------------------------------------------|--------------------------------------------------------------------|--------------------|---------|----------------------------------------|-------------------------------------------------------|-------------------------------------------------------|--------------------|-----------------|------------------------------------------------------------------|------------------------------------------------------|
|                                                    | ImH <sub>2</sub> <sup>+</sup> | ImH <sub>2</sub> <sup>+</sup><br>(H <sub>2</sub> O) <sub>2</sub> | MeImH <sub>2</sub> <sup>+</sup><br>(H <sub>2</sub> O) <sub>2</sub> | Expl. <sup>a</sup> | ImH     | ImH<br>(H <sub>2</sub> O) <sub>2</sub> | MeImH <sup>τ</sup><br>(H <sub>2</sub> O) <sub>2</sub> | MeImH <sup>π</sup><br>(H <sub>2</sub> O) <sub>2</sub> | Expl. <sup>b</sup> | Im <sup>-</sup> | ImH <sub>2</sub> <sup>-</sup><br>(H <sub>2</sub> O) <sub>2</sub> | MeIm<br>(H <sub>2</sub> O) <sub>2</sub> <sup>-</sup> |
| r(N <sub>1</sub> C <sub>2</sub> )                  | 1.336                         | 1.335                                                            | 1.333                                                              | 1.326              | 1.367   | 1.359                                  | 1.357                                                 | 1.319                                                 | 1.347              | 1.351           | 1.346                                                            | 1.345                                                |
| r(C <sub>2</sub> N <sub>3</sub> )                  | 1.336                         | 1.335                                                            | 1.336                                                              | 1.328              | 1.315   | 1.321                                  | 1.319                                                 | 1.361                                                 | 1.323              | 1.351           | 1.346                                                            | 1.346                                                |
| r(N <sub>3</sub> C <sub>4</sub> )                  | 1.384                         | 1.380                                                            | 1.388                                                              | 1.383              | 1.379   | 1.377                                  | 1.384                                                 | 1.384                                                 | 1.375              | 1.373           | 1.374                                                            | 1.377                                                |
| r(C <sub>5</sub> N <sub>1</sub> )                  | 1.384                         | 1.380                                                            | 1.382                                                              | 1.376              | 1.381   | 1.379                                  | 1.380                                                 | 1.378                                                 | 1.369              | 1.373           | 1.374                                                            | 1.375                                                |
| r(C <sub>4</sub> C <sub>5</sub> )                  | 1.363                         | 1.366                                                            | 1.370                                                              | 1.368              | 1.372   | 1.373                                  | 1.376                                                 | 1.375                                                 | 1.368              | 1.391           | 1.384                                                            | 1.386                                                |
| r(N <sub>1</sub> H)                                | 1.015                         | 1.040                                                            | 1.038                                                              | 1.070              | 1.010   | 1.022                                  | 1.022                                                 | --                                                    | 1.045              |                 |                                                                  | --                                                   |
| r(C <sub>2</sub> H)                                | 1.080                         | 1.079                                                            | 1.079                                                              | 1.089              | 1.082   | 1.081                                  | 1.082                                                 | 1.081                                                 | 1.077              | 1.092           | 1.088                                                            | 1.087                                                |
| r(N <sub>3</sub> H)                                | 1.015                         | 1.040                                                            | 1.037                                                              | 1.026              |         |                                        | --                                                    | 1.021                                                 |                    |                 |                                                                  | --                                                   |
| r(C <sub>4</sub> H/C <sub>4</sub> C <sub>6</sub> ) | 1.079                         | 1.079                                                            | 1.493                                                              | 1.497              | 1.082   | 1.081                                  | 1.499                                                 | 1.494                                                 | 1.077              | 1.090           | 1.086                                                            | 1.503                                                |
| r(C <sub>5</sub> H)                                | 1.079                         | 1.079                                                            | 1.082                                                              | 1.076              | 1.080   | 1.080                                  | 1.080                                                 | 1.082                                                 | 1.077              | 1.090           | 1.086                                                            | 1.086                                                |
| r(CH), Me                                          |                               |                                                                  | 1.092                                                              |                    |         |                                        | 1.095                                                 | 1.094                                                 |                    |                 |                                                                  | 1.026                                                |
| N <sub>1</sub> (H)...H(O)H                         |                               | 1.716                                                            | 1.726                                                              |                    |         | 1.892                                  | 1.902                                                 | 1.911                                                 |                    |                 | 1.827                                                            | 1.826                                                |
| N <sub>3</sub> (H)...H(O)H                         |                               | 1.716                                                            | 1.736                                                              |                    |         | 1.950                                  | 1.934                                                 | 1.938                                                 |                    |                 | 1.827                                                            | 1.811                                                |
|                                                    |                               |                                                                  |                                                                    |                    |         |                                        |                                                       |                                                       |                    |                 |                                                                  |                                                      |

<sup>a</sup> Neutron diffraction on HisH<sub>2</sub><sup>+</sup>Cl<sup>-</sup> Ref. [ 2 ]. <sup>b</sup> Neutron diffraction on ImH at -170 °C Ref. [ 3].

**Table.S2** Experimental<sup>1</sup> and calculated<sup>2</sup> vibrational frequencies (cm<sup>-1</sup>) and isotopic shifts<sup>3</sup> ( $\Delta$ , cm<sup>-1</sup>) of aqueous ImH<sub>2</sub><sup>+</sup> and normal mode assignments.

| v <sub>i</sub> | ImH <sub>2</sub> (H <sub>2</sub> O) <sub>2</sub> <sup>+</sup> |                   |       |                           |       |                                           |       |                                                              | ImD <sub>2</sub> (D <sub>2</sub> O) <sub>2</sub> <sup>+</sup> |       |                                              |       |                                           |       |  |  |
|----------------|---------------------------------------------------------------|-------------------|-------|---------------------------|-------|-------------------------------------------|-------|--------------------------------------------------------------|---------------------------------------------------------------|-------|----------------------------------------------|-------|-------------------------------------------|-------|--|--|
|                | <sup>4</sup> PED(%)                                           | Frequencies       |       | $\Delta$ C <sub>2</sub> D |       | $\Delta$ ( <sup>15</sup> NH) <sub>2</sub> |       | <sup>4</sup> PED(%)                                          | Frequencies                                                   |       | $\Delta$ (ND) <sub>2</sub> -C <sub>2</sub> D |       | $\Delta$ ( <sup>15</sup> ND) <sub>2</sub> |       |  |  |
|                | <b>In-plane modes</b>                                         | <sup>4</sup> Exp. | Calc. | <sup>4</sup> Exp.         | Calc. | <sup>5</sup> Exp.                         | Calc. |                                                              | <sup>4</sup> Exp.                                             | Calc. | <sup>4</sup> Exp.                            | Calc. | <sup>5</sup> Exp.                         | Calc. |  |  |
| 4a             | v <sub>C2N</sub> 16, v <sub>C2C</sub> 34, $\delta_{NH}$ 28    | 1594              | 1579  | 0                         | -8    | -8                                        | -10   | v <sub>C2C</sub> 59, $\delta_{CH}$ 22                        | <b>1548</b>                                                   | 1531  | -5                                           | -3    | -3                                        | -5    |  |  |
| 5a             | v <sub>NC</sub> 17, v <sub>C2C</sub> 34, $\delta_{NH}$ 16     | <b>1456</b>       | 1447  | -10                       | -9    | -12                                       | -8    | v <sub>C2N</sub> 40, v <sub>NC</sub> 21, v <sub>C2C</sub> 12 | <b>1399</b>                                                   | 1379  | -25                                          | -24   | -21                                       | -21   |  |  |
| 6a             | v <sub>C2N</sub> 65, $\delta_{NH}$ 15                         | <b>1211</b>       | 1205  | -14                       | -16   | -7                                        | -13   | v <sub>NC</sub> 42, v <sub>C2H</sub> 14, $\delta_{CH}$ 23    | 883                                                           | 880   | --                                           | -10   | --                                        | -7    |  |  |
| 7a             | v <sub>NC</sub> 84                                            | 1130              | 1121  | +1                        | -1    | -12                                       | -13   | v <sub>NC</sub> 61, v <sub>C2N</sub> 14                      | <b>1145</b>                                                   | 1135  | -4                                           | -6    | -10                                       | -11   |  |  |
| 9a             | v <sub>C2C</sub> 23, $\delta_{CH}$ 64                         | 1102              | 1093  | -4                        | -9    | 0                                         | 0     | v <sub>C2C</sub> 20, $\delta_{CH}$ 64                        | 1106                                                          | 1095  | -1                                           | -7    | 0                                         | -1    |  |  |
| 10a            | $\delta_{ring\ def.}$ 77, $\delta_{CH}$ 13                    | <b>923</b>        | 929   | +19                       | +16   | --                                        | -16   | $\delta_{rd.}$ 41, v <sub>C2N</sub> 16, $\delta_{ND}$ 17     | 920                                                           | 927   | +17                                          | +18   | -8                                        | -10   |  |  |
|                |                                                               |                   |       |                           |       |                                           |       |                                                              |                                                               |       |                                              |       |                                           |       |  |  |
| 5b             | v <sub>C2N</sub> 59, $\delta_{C2H}$ 26                        | <b>1538</b>       | 1525  | --                        | -31   | -10                                       | -11   | v <sub>C2N</sub> 59, $\delta_{C2H}$ 25                       | 1527                                                          | 1509  | --                                           | -32   | -8                                        | -9    |  |  |
| 6b             | v <sub>C2N</sub> 12, v <sub>NC</sub> 23, $\delta_{NH}$ 48     | --                | 1452  | --                        | -7    | --                                        | -15   | v <sub>NC</sub> 31, $\delta_{ND}$ 45                         | 924                                                           | 941   | --                                           | -9    | --                                        | -4    |  |  |
| 7b             | v <sub>NC</sub> 21, $\delta_{CH}$ 51                          | --                | 1315  | --                        | -4    | --                                        | -1    | v <sub>NC</sub> 44, v <sub>C2N</sub> 19, $\delta_{CH}$ 20    | 1379                                                          | 1356  | --                                           | -4    | --                                        | -15   |  |  |
| 8b             | v <sub>C2N</sub> 18, $\delta_{CH}$ 11, $\delta_{C2H}$ 50      | --                | 1178  | --                        | -358  | --                                        | -7    | $\delta_{CH}$ 50, $\delta_{C2H}$ 37                          | 1253                                                          | 1252  | --                                           | -448  | --                                        | -8    |  |  |
| 9b             | v <sub>NC</sub> 42, v <sub>C2H</sub> 14, $\delta_{CH}$ 23     | 1058              | 1045  | --                        | +52   | -3                                        | -3    | v <sub>C2N</sub> 23, $\delta_{C2H}$ 31                       | 1086                                                          | 1072  | --                                           | +104  | -1                                        | -1    |  |  |
| 10b            | $\delta_{ring\ def.}$ 85                                      | 908               | 918   | 0                         | 0     | --                                        | -12   | $\delta_{ring\ def.}$ 77, $\delta_{ND}$ 12                   | --                                                            | 896   | --                                           | +39   | --                                        | -9    |  |  |
|                | <b>Out-of-plane modes</b>                                     |                   |       |                           |       |                                           |       |                                                              |                                                               |       |                                              |       |                                           |       |  |  |
| 1a             | $\gamma_{NH}$ 46                                              | --                | 1049  | --                        | -4    | --                                        | -1    | $\gamma_{ND}$ 33, $\gamma_{CH}$ 30                           | --                                                            | 734   | --                                           | +44   | --                                        | -1    |  |  |
| 2a             | $\gamma_{CH}$ 98                                              | --                | 747   | --                        | +19   | --                                        | 0     | $\gamma_{CH}$ 83                                             | 767                                                           | 754   | --                                           | -1    | --                                        | -1    |  |  |
| 4a             | $\gamma_{ring\ def.}$ 83                                      | --                | 625   | --                        | -91   | --                                        | -10   | $\gamma_{ring\ def.}$ 86                                     | --                                                            | 622   | --                                           | -88   | --                                        | -9    |  |  |
|                |                                                               |                   |       |                           |       |                                           |       |                                                              |                                                               |       |                                              |       |                                           |       |  |  |
| 1b             | $\gamma_{NH}$ 47                                              | --                | 1005  | --                        | 0     | --                                        | -2    | $\gamma_{ND}$ 40                                             | --                                                            | 728   | --                                           | +2    | --                                        | -2    |  |  |
| 2b             | $\gamma_{CH}$ 84                                              | 884               | 857   | --                        | 0     | --                                        | 0     | $\gamma_{CH}$ 81                                             | --                                                            | 864   | --                                           | 0     | --                                        | 0     |  |  |
| 3b             | $\gamma_{CH}$ 69                                              | 864               | 823   | -136                      | -123  | --                                        | -1    | $\gamma_{CH}$ 60                                             | --                                                            | 842   | --                                           | -160  | --                                        | -2    |  |  |
| 4b             | $\gamma_{ring\ def.}$ 86                                      | 626               | 615   | +3                        | 0     | --                                        | -6    | $\gamma_{ring\ def.}$ 88                                     | 628                                                           | 611   | --                                           | 0     | --                                        | -5    |  |  |

<sup>1</sup>Values given in bold are taken from resonance Raman spectra excited at 229 nm and others are from non-resonant Raman spectra excited at 488 nm.; <sup>2</sup>Using B3LYP hybrid functional with 6-31 G\* basis set followed by the SQM procedure[4-8].; <sup>3</sup>Isotopic shifts ( $\Delta$ <sup>15</sup>N(data not shown) and  $\Delta$ C<sub>2</sub>D) are obtained from Raman spectra excited at 229 nm or 488 nm.; <sup>4</sup>% distribution from major internal coordinate contributions are given.

**Table.S3** Experimental<sup>1</sup> and calculated<sup>2</sup> vibrational frequencies (cm<sup>-1</sup>) and isotopic shifts<sup>3</sup> ( $\Delta$ , cm<sup>-1</sup>) of aqueous ImH and the normal mode assignments.

| v <sub>i</sub> | ImH(H <sub>2</sub> O) <sub>2</sub>                                              |  |             |       |                           |       |                                            |       | ImD(D <sub>2</sub> O) <sub>2</sub>                                            |  |             |       |                              |       |                                            |       |
|----------------|---------------------------------------------------------------------------------|--|-------------|-------|---------------------------|-------|--------------------------------------------|-------|-------------------------------------------------------------------------------|--|-------------|-------|------------------------------|-------|--------------------------------------------|-------|
|                | 4,5PED(%)                                                                       |  | Frequencies |       | $\Delta$ C <sub>2</sub> D |       | $\Delta$ <sup>15</sup> N- <sup>15</sup> NH |       | 4PED(%)                                                                       |  | Frequencies |       | $\Delta$ ND-C <sub>2</sub> D |       | $\Delta$ <sup>15</sup> N- <sup>15</sup> ND |       |
|                |                                                                                 |  | Exp.        | Calc. | Exp.                      | Calc. | Exp.                                       | Calc. |                                                                               |  | Exp.        | Calc. | Exp.                         | Calc. | Exp.                                       | Calc. |
|                | <b>In-plane modes</b>                                                           |  |             |       |                           |       |                                            |       | <b>In-plane modes</b>                                                         |  |             |       |                              |       |                                            |       |
| 4a             | v <sub>CC</sub> 34, v <sub>C2N</sub> 17, $\delta_{NH}$ 19, $\delta_{CH}$ 13     |  | <b>1534</b> | 1526  | -4                        | -8    | -6                                         | -8    | v <sub>CC</sub> 38, v <sub>C2N</sub> 24, $\delta_{CH}$ 17                     |  | <b>1507</b> | 1504  | +1                           | -7    | +1                                         | -7    |
| 5a             | v <sub>CC</sub> 18, v <sub>C2N</sub> 15, v <sub>NC</sub> 18, $\delta_{NH}$ 25   |  | <b>1428</b> | 1429  | -3                        | -5    | -13                                        | -13   | v <sub>C2N</sub> 40, v <sub>NC</sub> 20, $\delta_{CH}$ 12                     |  | <b>1324</b> | 1328  | -13                          | -20   | -10                                        | -17   |
| 6a             | v <sub>C2N</sub> 41, $\delta_{CH}$ 12, $\delta_{NH}$ 12, $\delta_{C2H}$ 15      |  | <b>1160</b> | 1149  | -57                       | -47   | -5                                         | -10   | $\delta_{ring\ def.}$ 32, $\delta_{ND}$ 43                                    |  | 861         | 871   | --                           | -59   | --                                         | -4    |
| 7a             | v <sub>NC</sub> 86                                                              |  | <b>1134</b> | 1138  | 0                         | -2    | -14                                        | -13   | v <sub>NC</sub> 80                                                            |  | <b>1136</b> | 1134  | -11                          | -6    | -13                                        | -13   |
| 9a             | v <sub>CC</sub> 23, $\delta_{CH}$ 43                                            |  | <b>1098</b> | 1091  | -3                        | -11   | 0                                          | -2    | v <sub>CC</sub> 24, $\delta_{CH}$ 53                                          |  | <b>1106</b> | 1104  | -12                          | -21   | -1                                         | -2    |
| 10a            | $\delta_{ring\ def.}$ 79                                                        |  | <b>933</b>  | 936   | +14                       | +16   | -13                                        | -16   | $\delta_{ring\ def.}$ 76                                                      |  | <b>912</b>  | 918   | +21                          | +12   | -14                                        | -16   |
|                |                                                                                 |  |             |       |                           |       |                                            |       |                                                                               |  |             |       |                              |       |                                            |       |
| 5b             | v <sub>CC</sub> 10, v <sub>C2N</sub> 24, v <sub>NC</sub> 19, $\delta_{C2H}$ 22, |  | <b>1489</b> | 1479  | -35                       | -28   | -5                                         | -8    | v <sub>CC</sub> 21, v <sub>C2N</sub> 33, $\delta_{C2H}$ 18, $\delta_{C2H}$ 18 |  | <b>1485</b> | 1471  | -31                          | -26   | -4                                         | -6    |
| 7b             | v <sub>C2N</sub> 28, v <sub>NC</sub> 29, $\delta_{CH}$ 30                       |  | <b>1329</b> | 1338  | -3                        | -7    | -4                                         | -10   | v <sub>C2N</sub> 32, v <sub>NC</sub> 26                                       |  | <b>1360</b> | 1351  | -3                           | -2    | -18                                        | -16   |
| 8b             | v <sub>C2N</sub> 24, $\delta_{CH}$ 18, $\delta_{C2H}$ 40                        |  | <b>1259</b> | 1253  | -58                       | -61   | -4                                         | -3    | $\delta_{CH}$ 30, $\delta_{C2H}$ 50                                           |  | <b>1253</b> | 1241  | -90                          | -87   | -10                                        | -9    |
| 9b             | v <sub>NC</sub> 27, v <sub>C2N</sub> 10, $\delta_{CH}$ 27, $\delta_{C2H}$ 12    |  | <b>1067</b> | 1056  | -245                      | -445  | -10                                        | -10   | v <sub>NC</sub> 18, v <sub>C2N</sub> 19, $\delta_{CH}$ 27, $\delta_{C2H}$ 13  |  | <b>1070</b> | 1057  | -248                         | -247  | -4                                         | -2    |
| 10b            | $\delta_{ring\ def.}$ 82                                                        |  | 915         | 920   | +6                        | +2    | --                                         | -15   | $\delta_{ring\ def.}$ 51, v <sub>C2N</sub> 10, $\delta_{ND}$ 11               |  | <b>949</b>  | 941   | +2                           | +9    | -15                                        | -13   |
|                | <b>Out-of-plane modes</b>                                                       |  |             |       |                           |       |                                            |       | <b>Out-of-plane modes</b>                                                     |  |             |       |                              |       |                                            |       |
| 1a             | $\gamma_{CH}$ 31, $\gamma_{NH}$ 31 (891)                                        |  | 867         | 869   | -2                        | -2    | --                                         | 0     | $\gamma_{CH}$ 31, $\gamma_{NH}$ 31                                            |  | 621         | 599   | --                           | +17   | --                                         | -7    |
| 2a             | $\gamma_{CH}$ 82 (736)                                                          |  | 764         | 722   | +3                        | +12   | --                                         | 0     | $\gamma_{CH}$ 82                                                              |  | 765         | 722   | --                           | +13   | --                                         | 0     |
| 4a             | $\gamma_{ring\ def.}$ 89 (658)                                                  |  | 663         | 657   | -107                      | -106  | --                                         | -9    | $\gamma_{ring\ def.}$ 89                                                      |  | -           | 660   | --                           | -110  | --                                         | -9    |
|                |                                                                                 |  |             |       |                           |       |                                            |       |                                                                               |  |             |       |                              |       |                                            |       |
| 2b             | $\gamma_{CH}$ 74 (839)                                                          |  | 842         | 829   | --                        | -1    | --                                         | 0     | $\gamma_{CH}$ 74                                                              |  | --          | 842   | --                           | -2    | --                                         | 0     |
| 3b             | $\gamma_{CH}$ 85 (827)                                                          |  | --          | 820   | --                        | -125  | --                                         | 0     | $\gamma_{CH}$ 85                                                              |  | --          | 820   | --                           | -123  | --                                         | 0     |
| 4b             | $\gamma_{ring\ def.}$ 82 (618)                                                  |  | 613         | 606   | +19                       | +18   | 0                                          | -7    | $\gamma_{ring\ def.}$ 82                                                      |  | --          | 622   | --                           | +4    | +3                                         | -1    |

<sup>1-4</sup> as in Table S2.

<sup>5</sup>Frequencies given in parenthesis are taken from reported IR spectra [ 9 ].

**Table.S4** Experimental<sup>1</sup> and calculated<sup>2</sup> vibrational frequencies (cm<sup>-1</sup>) and isotopic shifts ( $\Delta$ , cm<sup>-1</sup>)<sup>3</sup> of aqueous Im<sup>-</sup>

| $\nu_I$ | <sup>4</sup> PED(%)                                                  | Frequencies |       | $\Delta_{C_2D}$ |       | $\Delta(^{15}N)_2$ |       |
|---------|----------------------------------------------------------------------|-------------|-------|-----------------|-------|--------------------|-------|
|         |                                                                      | Exp.        | Calc. | Exp.            | Calc. | Exp.               | Calc. |
|         | <b>In-plane modes</b>                                                |             |       |                 |       |                    |       |
| 4a      | $\nu_{CC}$ 55, $\delta_{CH}$ 30                                      | <b>1454</b> | 1454  | +3              | 0     | -2                 | -3    |
| 5a      | $\nu_{NC}$ 18, $\nu_{C_2N}$ 63                                       | <b>1248</b> | 1251  | -22             | -22   | -17                | -21   |
| 7a      | $\nu_{NC}$ 88                                                        | <b>1141</b> | 1157  | -2              | -7    | -16                | -15   |
| 9a      | $\nu_{CC}$ 37, $\delta_{CH}$ 54                                      | <b>1099</b> | 1085  | -5              | -7    | -2                 | -3    |
| 10a     | $\delta_{ring\ def.}$ 70, $\delta_{CH}$ 10                           | <b>946</b>  | 950   | -8              | -7    | -21                | -19   |
|         |                                                                      |             |       |                 |       |                    |       |
| 5b      | $\nu_{NC}$ 10, $\nu_{C_2N}$ 40, $\delta_{CH}$ 16, $\delta_{C_2H}$ 31 | <b>1472</b> | 1470  | --              | -38   | -3                 | -9    |
| 7b      | $\nu_{NC}$ 26, $\nu_{C_2N}$ 25, $\delta_{CH}$ 32                     | 1310        | 1310  | -13             | -8    | --                 | -6    |
| 8b      | $\nu_{NC}$ 11, $\nu_{C_2N}$ 32, $\delta_{CH}$ 13, $\delta_{C_2H}$ 40 | --          | 1220  | --              | -358  | -4                 | -5    |
| 9b      | $\nu_{NC}$ 42, $\nu_{C_2N}$ 11, $\delta_{CH}$ 26, $\delta_{C_2H}$ 12 | <b>1077</b> | 1080  | --              | +52   | --                 | -14   |
| 10b     | $\delta_{ring\ def.}$ 88                                             | 930         | 938   | +21             | +21   | --                 | -13   |
|         | <b>Out-of-plane modes</b>                                            |             |       |                 |       |                    |       |
| 2a      | $\gamma_{CH}$ 90                                                     | --          | 676   | --              | +3    | --                 | 0     |
| 4a      | $\gamma_{ring\ def.}$ 85                                             | 658         | 643   | +2              | 0     | --                 | -7    |
|         |                                                                      |             |       |                 |       |                    |       |
| 2b      | $\gamma_{CH}$ 90                                                     | 780         | 767   | --              | 0     | --                 | 0     |
| 3b      | $\gamma_{C_2H}$ 80                                                   | --          | 738   | --              | -233  | --                 | 0     |
| 4b      | $\gamma_{ring\ def.}$ 92                                             | 847         | 798   | --              | +33   | --                 | -11   |

<sup>1-4</sup> as in Table S2.



**Table.S5** Experimental<sup>1</sup> and calculated<sup>2</sup> vibrational frequencies (cm<sup>-1</sup>) and their normal mode assignments of the indicated molecules. Experimental frequencies of HisH<sub>2</sub><sup>+</sup> and HisD<sub>2</sub><sup>+</sup> are shown for comparison. Calculated <sup>15</sup>N isotopic shifts(cm<sup>-1</sup>)<sup>3</sup> also listed.

| v <sub>i</sub>                     | 4-MeImH <sub>2</sub> (H <sub>2</sub> O) <sub>2</sub> <sup>+</sup>                   |             |       | Δ <sup>15</sup> N | HisH <sub>2</sub> <sup>+</sup> | 4-MeImD <sub>2</sub> (D <sub>2</sub> O) <sub>2</sub> <sup>+</sup>                              |             |      | Δ <sup>15</sup> N | HisD <sub>2</sub> <sup>+</sup> |
|------------------------------------|-------------------------------------------------------------------------------------|-------------|-------|-------------------|--------------------------------|------------------------------------------------------------------------------------------------|-------------|------|-------------------|--------------------------------|
|                                    | <sup>4</sup> PED(%)                                                                 | Frequencies |       |                   | Freq.                          | <sup>4</sup> PED(%)                                                                            | Frequencies |      |                   | Freq.                          |
|                                    |                                                                                     | Exp.        | Calc. |                   | Calc.                          |                                                                                                | Exp.        | Exp. |                   | Calc.                          |
| 4a                                 | v <sub>C4C5</sub> (40), v <sub>C4-C6</sub> (10), δ <sub>N3,1-H</sub> (10,4)         | 1634        | 1614  | -5                | 1634                           | v <sub>C4C5</sub> (40), v <sub>C4-C6</sub> (10)                                                | 1610        | 1589 | -3                | 1610                           |
| 5a                                 | v <sub>N1-C2,5</sub> (15,12), v <sub>C4C5</sub> (8), δ <sub>N1-H</sub> (34)         | 1490        | 1484  | -8                | 1493                           | v <sub>N1-C2,5</sub> (14,16), δ <sub>CH3</sub> (44)                                            | 1412        | 1386 | -17               | 1412                           |
| 6a                                 | v <sub>N1-C2,5</sub> (39,10), δ <sub>N1,C2-H</sub> (12,18)                          | 1205        | 1186  | -8                | 1200                           | v <sub>N3-C2</sub> (10), δ <sub>ring</sub> (24), δ <sub>C2H</sub> (11), δ <sub>N3-D</sub> (18) | 985         | 983  | -12               | 992                            |
| 7a                                 | v <sub>N3-C2,4</sub> (25,5), δ <sub>N3,C2-H</sub> (12,33), δ <sub>C5-H</sub> (16)   | 1184        | 1166  | -5                | 1186                           | v <sub>N1-C5</sub> (23), v <sub>C4-C6</sub> (16), δ <sub>C5-H</sub> (40)                       | 1260        | 1245 | -4                | 1260                           |
| 9a                                 | v <sub>N1-C2,5</sub> (5,50), δ <sub>C2,5-H</sub> (8,18)                             | 1089        | 1082  | -5                | 1097                           | v <sub>N1-C2,5</sub> (22,30), δ <sub>C2-H</sub> (18)                                           | 1110        | 1097 | -4                | 1114                           |
| 10a                                | δ <sub>ring def.</sub> (64), v <sub>N3C4</sub> (16)                                 | 929         | 929   | -15               | 928                            | δ <sub>ring def.</sub> (36), v <sub>N3C4</sub> (26)                                            | 918         | 910  | -11               | 921                            |
| 5b                                 | v <sub>C2-N1,3</sub> (33,29), δ <sub>C2H</sub> (25)                                 | 1535        | 1526  | -10               | 1535                           | v <sub>C2-N1,3</sub> (33,28), δ <sub>C2H</sub> (25)                                            | --          | 1512 | -10               | 1523                           |
| 6b                                 | v <sub>C4C5</sub> (14), δ <sub>N3-H</sub> (24), δ <sub>CH3</sub> (24)               | 1441        | 1425  | -7                | --                             | δ <sub>ring</sub> (37), δ <sub>N3,1-D</sub> (14,23)                                            | --          | 879  | -5                | --                             |
| 7b                                 | v <sub>N1,3-C5,4</sub> (22,12) v <sub>N3-C2</sub> 15 δ <sub>C5,4-H,C6</sub> (18,20) | 1270        | 1256  | -9                | --                             | v <sub>C4,C5</sub> (12), v <sub>N3-C2,C4</sub> (17,33), δ <sub>ring</sub> (12)                 | 1372        | 1350 | -15               | --                             |
| 8b                                 | v <sub>N1,3-C5,4</sub> (5,23), δ <sub>CCH</sub> (18), δ <sub>C5H</sub> (19)         | 1296        | 1287  | -1                | 1270                           | δ <sub>C5H</sub> (16), δ <sub>C2H</sub> (35)                                                   | --          | 1226 | -7                | --                             |
| 9b                                 | v <sub>C4C5</sub> (18), δ <sub>N1-C2-N3</sub> (22), δ <sub>CH3</sub> (36)           | 1008        | 1003  | -2                | 998                            | v <sub>C4C5</sub> (16), δ <sub>C5H</sub> (12), δ <sub>CCH</sub> (44)                           | 1023        | 1012 | -1                | 1007                           |
| 10b                                | v <sub>N3-C4</sub> (16), δ <sub>ring</sub> (38), δ <sub>CH3</sub> (30)              | 978         | 973   | -15               | --                             | δ <sub>N1,3-D</sub> (23,14), δ <sub>ring</sub> (24)                                            | --          | 942  | -6                | --                             |
| <b>Methyl/Histidyl group modes</b> |                                                                                     |             |       |                   |                                |                                                                                                |             |      |                   |                                |
|                                    | v <sub>N3-C2,4</sub> (9,7), δ <sub>N3H</sub> (12), δ <sub>CH3</sub> (52)            | --          | 1464  | -6                | 1467                           | δ <sub>CH3</sub> (76)                                                                          | --          | 1454 | -2                | --                             |
|                                    | δ <sub>CH3</sub> (91)                                                               | --          | 1445  | 0                 | 1443                           | δ <sub>CH3</sub> (91)                                                                          | --          | 1445 | 0                 | --                             |
|                                    | δ <sub>CH3</sub> (89)                                                               | 1398        | 1391  | 0                 | --                             | δ <sub>CH3</sub> (44), v <sub>N1-C2</sub> (14), v <sub>C4-C6</sub> (10)                        | 1395        | 1396 | -3                | 1396                           |
|                                    | δ <sub>CCH</sub> (72)                                                               | --          | 1056  | 0                 | --                             | δ <sub>CCH</sub> (76)                                                                          | --          | 1055 | -1                | --                             |

<sup>1</sup>Values are taken from resonance Raman spectra excited at 229 nm .; <sup>2-4</sup> as in Table S2.

**Table.S6** Experimental<sup>1</sup> and calculated<sup>2</sup> vibrational frequencies (cm<sup>-1</sup>) and normal mode assignments for the  $\tau$  (N<sub>1</sub>H) tautomer of 4-MeImH. Experimental frequencies of HisH are included for comparison. Calculated <sup>15</sup>N isotopic shifts(cm<sup>-1</sup>)<sup>3</sup> are also listed.

| v <sub>i</sub> | $\tau$ -MeImH(H <sub>2</sub> O) <sub>2</sub> [N <sub>1</sub> H]                        |                   |       |                       | HisH  | $\tau$ -MeImD(D <sub>2</sub> O) <sub>2</sub> [N <sub>1</sub> D]                                                |                   |       |                       | HisD  |
|----------------|----------------------------------------------------------------------------------------|-------------------|-------|-----------------------|-------|----------------------------------------------------------------------------------------------------------------|-------------------|-------|-----------------------|-------|
|                | <sup>4</sup> PED(%)                                                                    | Frequencies       |       | $\Delta^{15}\text{N}$ | Freq. | <sup>3</sup> PED(%)                                                                                            | Frequencies       |       | $\Delta^{15}\text{N}$ | Freq. |
|                |                                                                                        | <sup>5</sup> Exp. | Calc. | Calc.                 | Exp.  |                                                                                                                | <sup>5</sup> Exp. | Calc. | Calc.                 | Exp.  |
| 4a             | $\nu_{\text{C4C5}}$ (52), $\nu_{\text{C4-C6}}$ (13), $\delta_{\text{C5-H}}$ (10)       | 1577              | 1559  | -3                    | 1575  | $\nu_{\text{C4C5}}$ (54), $\nu_{\text{C4-C6}}$ (15), $\delta_{\text{ring}}$ (10)                               | 1572              | 1553  | -3                    | 1561  |
| 5a             | $\nu_{\text{N1-C5,2}}$ (5,11), $\delta_{\text{N1-H}}$ (16), $\delta_{\text{CH3}}$ (51) | 1454              | 1453  | -14                   | 1453  | $\nu_{\text{N3-C4,2}}$ (25,29), $\delta_{\text{ring}}$ (10)                                                    | 1308              | 1311  | -21                   | 1322  |
| 6a             | $\nu_{\text{N1-C2,5}}$ (47,9), $\delta_{\text{N1-H}}$ (19), $\delta_{\text{C2H}}$ (11) | <b>1158</b>       | 1149  | -9                    | 1164  | $\delta_{\text{N1-D}}$ (49), $\delta_{\text{ring}}$ (16)                                                       | --                | 876   | -3                    | --    |
| 7a             | $\nu_{\text{N1,3-C5,4}}$ (12,28), $\nu_{\text{C4-C6}}$ (16)                            | <b>1260</b>       | 1258  | -7                    | 1286  | $\delta_{\text{C5,2-H}}$ (39,35)                                                                               | <b>1227</b>       | 1216  | -4                    | 1234  |
| 9a             | $\nu_{\text{N1-C5,2}}$ (43,11), $\delta_{\text{C5-H}}$ (21)                            | 1087              | 1075  | -5                    | 1090  | $\delta_{\text{CCH}}$ (25), $\nu_{\text{C4C5}}$ (22), $\delta_{\text{ring}}$ (18), $\delta_{\text{ring}}$ (10) | 1019              | 1014  | -5                    | 1023  |
| 10a            | $\delta_{\text{ring def.}}$ (66), $\nu_{\text{N3C4}}$ (14)                             | 936               | 940   | -15                   | 940   | $\delta_{\text{ring def.}}$ (61), $\nu_{\text{N3C4}}$ (14)                                                     | 926               | 928   | -14                   | 926   |
| 5b             | $\nu_{\text{C2-N3,N1}}$ (33,6), $\delta_{\text{C2H}}$ (24)                             | <b>1494</b>       | 1497  | -7                    | 1498  | $\nu_{\text{C2-N3,N1}}$ (12,34), $\delta_{\text{C2H}}$ (24)                                                    | <b>1489</b>       | 1490  | -7                    | 1486  |
| 7b             | $\nu_{\text{N3-C4,2}}$ (25,28), $\nu_{\text{C5-N1,C4}}$ (7,10)                         | 1305              | 1314  | -12                   | 1324  | $\nu_{\text{N1-C5,2}}$ (26,37), $\delta_{\text{ring}}$ (13), $\delta_{\text{N1-D}}$ (14)                       | 1375              | 1357  | -14                   | 1376  |
| 8b             | $\nu_{\text{N1,3-C5,2}}$ (12,6), $\delta_{\text{C5,2-H}}$ (32,28)                      | <b>1231</b>       | 1222  | -5                    | 1239  | $\nu_{\text{N1,3-C5,4}}$ (20,25), $\nu_{\text{C4-C6}}$ (16)                                                    | <b>1260</b>       | 1250  | -8                    | 1274  |
| 9b             | $\delta_{\text{CCH}}$ (48), $\nu_{\text{C4C5}}$ (20), $\delta_{\text{ring}}$ (18)      | 997               | 999   | 0                     | 993   | $\nu_{\text{N1-C5,2}}$ (27,29), $\delta_{\text{C5-H}}$ (12)                                                    | <b>1100</b>       | 1080  | 0                     | 1099  |
| 10b            | $\delta_{\text{ring def.}}$ (38), $\nu_{\text{N3C4}}$ (22)                             | <b>977</b>        | 975   | -20                   | --    | $\delta_{\text{ring def.}}$ (15), $\nu_{\text{N3C4}}$ (22), $\delta_{\text{CCH}}$ (39)                         | --                | 980   | -16                   | 991   |
|                | <b>Methyl/Histidyl group modes</b>                                                     |                   |       |                       |       | <b>Methyl/Histidyl group modes</b>                                                                             |                   |       |                       |       |
|                | $\nu_{\text{C2-N1,3}}$ (19,8), $\delta_{\text{N1-H}}$ (12), $\delta_{\text{CH3}}$ (31) | --                | 1455  | -1                    | 1453  | $\delta_{\text{CH3}}$ (75)                                                                                     | --                | 1467  | -1                    | --    |
|                | $\delta_{\text{CH3}}$ (78)                                                             | --                | 1470  | -2                    | 1463  | $\delta_{\text{CH3}}$ (82)                                                                                     | <b>1456</b>       | 1454  | -3                    | --    |
|                | $\delta_{\text{CH3}}$ (88)                                                             | <b>1390</b>       | 1388  | 0                     | --    | $\delta_{\text{CH3}}$ (87)                                                                                     | <b>1390</b>       | 1389  | -1                    | 1389  |
|                | $\delta_{\text{CCH}}$ (77)                                                             | --                | 1056  | 0                     | --    | $\delta_{\text{CCH}}$ (78)                                                                                     | --                | 1057  | 0                     | --    |

<sup>1-4</sup> as in Table S5.

<sup>5</sup> Values given in bold numbers are from overlapping bands assigned to both  $\tau$ -MeIm and  $\pi$ -MeIm.

**Table.S7** Experimental<sup>1</sup> and calculated<sup>2</sup> vibrational frequencies (cm<sup>-1</sup>) and normal mode assignments for the  $\pi$  (N<sub>3</sub>H) tautomer of 4-MeImH. Experimental frequencies of HisH are included for comparison. Calculated <sup>15</sup>N isotopic shifts(cm<sup>-1</sup>)<sup>3</sup> are also listed.

| v <sub>i</sub> | $\pi$ -MeImH(H <sub>2</sub> O) <sub>2</sub> [N <sub>3</sub> H]                          |                   |       | HisH                  | $\pi$ -MeImD(D <sub>2</sub> O) <sub>2</sub> [N <sub>3</sub> D] |                                                                                            |             | HisD              |                       |       |
|----------------|-----------------------------------------------------------------------------------------|-------------------|-------|-----------------------|----------------------------------------------------------------|--------------------------------------------------------------------------------------------|-------------|-------------------|-----------------------|-------|
|                | <sup>4</sup> PED(%)                                                                     | Frequencies       |       | $\Delta^{15}\text{N}$ | Freq.                                                          | <sup>4</sup> PED(%)                                                                        | Frequencies |                   | $\Delta^{15}\text{N}$ | Freq. |
|                |                                                                                         | <sup>5</sup> Exp. | Calc. | Calc.                 |                                                                |                                                                                            | Exp.        | <sup>5</sup> Exp. | Calc.                 |       |
| 4a             | v <sub>C4C5</sub> (42), v <sub>C4-C6</sub> (14), $\delta_{\text{N3-H}}$ (13)            | 1596              | 1582  | -4                    | 1593                                                           | v <sub>C4C5</sub> (50), v <sub>C4-C6</sub> (16), $\delta_{\text{C5H}}$ (12)                | 1579        | 1563              | -3                    | 1570  |
| 5a             | v <sub>C4C5</sub> (18), v <sub>N3-C2,4</sub> (11,8), $\delta_{\text{N3-H}}$ (28)        | 1426              | 1417  | -9                    | 1435                                                           | v <sub>N3-C4,2</sub> (22,27), $\delta_{\text{N1-C5}}$ (14)                                 | 1326        | 1322              | -20                   | 1336  |
| 6a             | v <sub>N3-C2</sub> (43), $\delta_{\text{N3-H}}$ (16), $\delta_{\text{C2H}}$ (17)        | <b>1158</b>       | 1128  | -7                    | 1164                                                           | $\delta_{\text{N1-D}}$ (54)                                                                | --          | 898               | -1                    | --    |
| 7a             | v <sub>N3-C2</sub> (12), $\delta_{\text{C2,C5-H}}$ (19,48)                              | <b>1260</b>       | 1251  | -3                    | 1269                                                           | v <sub>N3-C2</sub> (13), v <sub>N1-C5</sub> (16), $\delta_{\text{C5-H}}$ (35)              | --          | 1210              | -10                   | 1197  |
| 9a             | v <sub>N1-C5</sub> (53), $\delta_{\text{C5-H}}$ (17)                                    | 1103              | 1115  | -7                    | --                                                             | $\delta_{\text{CCH}}$ (37), v <sub>C4C5</sub> (20), $\delta_{\text{ring}}$ (15)            | 1019        | 1002              | -3                    | 1007  |
| 10a            | $\delta_{\text{ring def.}}$ (52), v <sub>N3C4</sub> (10)                                | --                | 936   | -17                   | --                                                             | $\delta_{\text{ring def.}}$ (51), v <sub>N3C4</sub> (14)                                   | 945         | 936               | -18                   | 947   |
| 4b             | v <sub>C2-N1,3</sub> (26,9), $\delta_{\text{C2H}}$ (18), $\delta_{\text{CH3}}$ (24)     | <b>1494</b>       | 1487  | -6                    | 1498                                                           | v <sub>C2-N3,N1</sub> (9,28), $\delta_{\text{C2H}}$ (17), $\delta_{\text{CH3}}$ (26)       | <b>1489</b> | 1483              | -5                    | 1486  |
| 7b             | v <sub>N1,3-C5,4</sub> (12,22), v <sub>C2-N1</sub> (23)                                 | 1344              | 1346  | -11                   | 1360                                                           | v <sub>N3-C4</sub> (40), $\delta_{\text{ring}}$ (13)                                       | 1366        | 1354              | -8                    | 1359  |
| 8b             | v <sub>N1-C5,2</sub> (26,11), v <sub>C4-N3,C6</sub> (13,12), $\delta_{\text{C2H}}$ (16) | <b>1231</b>       | 1231  | -11                   | 1239                                                           | v <sub>N1-C5</sub> (13), $\delta_{\text{CH3}}$ (13), $\delta_{\text{C5H}}$ (51)            | --          | 1247              | -3                    | --    |
| 9b             | $\delta_{\text{CCH}}$ (14), v <sub>C4C5</sub> (19), $\delta_{\text{ring}}$ (35)         | 1015              | 1010  | -8                    | 1011                                                           | v <sub>N1-C5</sub> (54), $\delta_{\text{C5-H}}$ (15)                                       | 1100        | 1115              | 0                     | 1100  |
| 10b            | $\delta_{\text{ring def.}}$ (38), v <sub>N3C4</sub> (12)                                | <b>977</b>        | 974   | -12                   | 969                                                            | $\delta_{\text{ring def.}}$ (29), v <sub>N3C4,C2</sub> (11,12), $\delta_{\text{CH3}}$ (23) | 982         | 969               | -15                   | 991   |
|                | <b>Methyl/Histidyl group modes</b>                                                      |                   |       |                       |                                                                | <b>Methyl/Histidyl group modes</b>                                                         |             |                   |                       |       |
|                | v <sub>C2-N1,3</sub> (14,17), $\delta_{\text{CH3}}$ (41)                                | --                | 1457  | -6                    | 1458                                                           | $\delta_{\text{CH3}}$ (42), v <sub>N1-C2</sub> (18)                                        | <b>1456</b> | 1453              | -4                    | --    |
|                | $\delta_{\text{CH3}}$ (89)                                                              | --                | 1448  | 0                     | --                                                             | $\delta_{\text{CH3}}$ (82)                                                                 | --          | 1448              | -1                    | --    |
|                | $\delta_{\text{CH3}}$ (80)                                                              | <b>1390</b>       | 1388  | -1                    | --                                                             | $\delta_{\text{CH3}}$ (89)                                                                 | <b>1390</b> | 1389              | 0                     | --    |
|                | $\delta_{\text{CCH}}$ (79)                                                              | --                | 1052  | 0                     | --                                                             | $\delta_{\text{CCH}}$ (79)                                                                 | --          | 1052              | 0                     | --    |

<sup>1-5</sup> as in Table S6.

**Table.S8** Experimental<sup>1</sup> and calculated<sup>2</sup> vibrational frequencies (cm<sup>-1</sup>) and normal mode assignments for 4-MeIm(H<sub>2</sub>O)<sub>2</sub><sup>-</sup>. Experimental frequencies of His<sup>-</sup> are included for comparison. Calculated <sup>15</sup>N isotopic shifts(cm<sup>-1</sup>)<sup>3</sup> are also listed.

| v <sub>i</sub>                     | 4-MeIm(H <sub>2</sub> O) <sub>2</sub> <sup>-</sup>                              |                   |       | His <sup>-</sup>  |       |
|------------------------------------|---------------------------------------------------------------------------------|-------------------|-------|-------------------|-------|
|                                    | <sup>4</sup> PED(%)                                                             | Frequencies       |       | Δ <sup>15</sup> N | Freq. |
|                                    |                                                                                 | <sup>5</sup> Exp. | Calc. | Calc.             | Exp.  |
| 4a                                 | v <sub>C4C5</sub> (46), v <sub>C4-C6</sub> (14), δ <sub>C5-H</sub> (15)         | 1536              | 1514  | -1                | 1531  |
| 5a                                 | v <sub>C2-N1,3</sub> (25,42), δ <sub>C5-H</sub> (12)                            | 1260              | 1256  | -12               | 1259  |
| 7a                                 | v <sub>N1-C2</sub> (13), v <sub>N1,3-C5,4</sub> (39,13), δ <sub>C5-H</sub> (15) | 1233              | 1242  | -17               | 1235  |
| 9a                                 | δ <sub>ring def.</sub> (50), v <sub>C4C5</sub> (18)                             | 1010              | 1008  | -11               | 1009  |
| 10a                                | δ <sub>ring def.</sub> (60), v <sub>N3-C4</sub> (16)                            | 951               | 958   | -16               | 953   |
| 5b                                 | v <sub>C2-N1,3</sub> (15,18), δ <sub>C2-H</sub> (24), δ <sub>CH3</sub> (23)     | 1441              | 1444  | -6                | 1438  |
| 7b                                 | v <sub>C2-N1,3</sub> (12,6), v <sub>N1,3-C5,4</sub> (3,35)                      | 1297              | 1312  | -8                | 1315  |
| 8b                                 | v <sub>C2-N1,3</sub> (7,23), δ <sub>C5-H</sub> (12), δ <sub>C2-H</sub> (46)     | --                | 1210  | -10               | --    |
| 9b                                 | v <sub>N1-C2,5</sub> (11,42), δ <sub>C2-H</sub> (24)                            | 1100              | 1110  | -4                | 1104  |
| 10b                                | δ <sub>CCH</sub> (52), δ <sub>ring</sub> (16)                                   | --                | 983   | -10               | --    |
| <b>Methyl/Histidyl group modes</b> |                                                                                 |                   |       |                   |       |
|                                    | v <sub>C2-H</sub> (10), δ <sub>CH3</sub> (57)                                   | --                | 1481  | -2                | --    |
|                                    | δ <sub>CH3</sub> (88)                                                           | --                | 1456  | 0                 | --    |
|                                    | δ <sub>CH3</sub> (87)                                                           | --                | 1376  | 0                 | --    |
|                                    | δ <sub>CCH</sub> (82)                                                           | --                | 1044  | 0                 | --    |

<sup>1-4</sup> as in Table S5.

**Table S9.** Internal coordinate coefficients<sup>a</sup> in the computed eigenvectors and vibrational frequencies  $\text{Im}(\text{H}_2\text{O})_2^-$ .

| $v_i$ | Mode                                | $\text{Im}(\text{H}_2\text{O})_2^-$ |                     |                         |       |
|-------|-------------------------------------|-------------------------------------|---------------------|-------------------------|-------|
|       |                                     | $v(\text{C}_4\text{-C}_5)$          | $v^+(\text{N-C}_2)$ | $v^+(\text{N-C}_{4,5})$ | Freq. |
| 4a    | $v(\text{C}_4\text{-C}_5)$          | -0.344                              | 0.068               | 0.120                   | 1454  |
| 5a    | $v^+(\text{N-C}_2)$                 | -0.077                              | -0.308              | 0.175                   | 1251  |
| 7a    | $v^+(\text{N-C}_{4,5})$             | -0.051                              | -0.091              | -0.327                  | 1157  |
| 9a    | $\delta^+(\text{C}_{4,5}\text{-H})$ | 0.179                               | -0.021              | -0.025                  | 1085  |
| 10a   | $\delta^+$ ring                     | 0.013                               | -0.076              | 0.009                   | 950   |
|       |                                     |                                     | $v^-(\text{N-C}_2)$ | $v^-(\text{N-C}_{4,5})$ |       |
| 5b    | $v^-(\text{N-C}_2)$                 |                                     | -0.295              | -0.160                  | 1470  |
| 7b    | $v^-(\text{N-C}_{4,5})$             |                                     | 0.229               | -0.250                  | 1310  |
| 8b    | $\delta(\text{C}_2\text{-H})$       |                                     | 0.203               | -0.131                  | 1220  |
| 9b    | $\delta^-(\text{C}_{4,5}\text{-H})$ |                                     | -0.101              | -0.206                  | 1080  |
| 10b   | $\delta^-$ ring                     |                                     | -0.006              | 0.070                   | 938   |

<sup>a</sup> Symmetry coordinate coefficients are given for pairs of bonds related by 2-fold symmetry:  
 $v^\pm(\text{N-C}_2) = (\text{N}_1\text{-C}_2 \pm \text{N}_3\text{-C}_2)$ ;  $v^\pm(\text{N-C}_{4,5}) = (\text{N}_1\text{-C}_5 \pm \text{N}_3\text{-C}_4)$ ;  $\delta^\pm(\text{C}_{4,5}\text{-H}) = (\text{C}_4\text{-H} \pm \text{C}_5\text{-H})$ ;

**Table S10.** Internal coordinate coefficients<sup>a</sup> in the computed eigenvectors and vibrational frequencies of ImH(H<sub>2</sub>O)<sub>2</sub> and ImD(D<sub>2</sub>O)<sub>2</sub>.

| v <sub>i</sub> | Mode                                 | ImH(H <sub>2</sub> O) <sub>2</sub> |                                    |                                    |                                    |                                    |       | ImD(D <sub>2</sub> O) <sub>2</sub> |                                    |                                    |                                    |                                    |       |
|----------------|--------------------------------------|------------------------------------|------------------------------------|------------------------------------|------------------------------------|------------------------------------|-------|------------------------------------|------------------------------------|------------------------------------|------------------------------------|------------------------------------|-------|
|                |                                      | v(N <sub>1</sub> -C <sub>2</sub> ) | v(C <sub>2</sub> -N <sub>3</sub> ) | v(N <sub>1</sub> -C <sub>5</sub> ) | v(N <sub>3</sub> -C <sub>4</sub> ) | v(C <sub>4</sub> -C <sub>5</sub> ) | Freq. | v(N <sub>1</sub> -C <sub>2</sub> ) | □(C <sub>2</sub> -N <sub>3</sub> ) | v(N <sub>1</sub> -C <sub>5</sub> ) | v(N <sub>3</sub> -C <sub>4</sub> ) | v(C <sub>4</sub> -C <sub>5</sub> ) | Freq. |
| 4a             | v(C <sub>4</sub> -C <sub>5</sub> )   | -0.035                             | -0.174                             | 0.048                              | -0.065                             | 0.254                              | 1526  | 0.051                              | -0.215                             | 0.002                              | -0.082                             | 0.277                              | 1504  |
| 5a             | v <sup>+</sup> (N-C <sub>2</sub> )   | -0.184                             | 0.042                              | 0.211                              | 0.036                              | -0.194                             | 1429  | 0.149                              | 0.209                              | -0.038                             | -0.205                             | 0.097                              | 1328  |
| 6a             | δ <sup>+</sup> (N-H/D)               | 0.209                              | 0.023                              | -0.013                             | 0.098                              | 0.073                              | 1149  | -0.040                             | -0.012                             | 0.050                              | 0.012                              | 0.027                              | 871   |
| 7a             | v <sup>+</sup> (N-C <sub>4,5</sub> ) | -0.020                             | 0.026                              | 0.205                              | 0.256                              | 0.021                              | 1138  | 0.095                              | 0.038                              | 0.158                              | 0.270                              | 0.053                              | 1134  |
| 9a             | δ <sup>+</sup> (C <sub>4,5</sub> -H) | 0.072                              | 0.038                              | -0.091                             | 0.084                              | -0.144                             | 1091  | -0.039                             | 0.028                              | -0.031                             | 0.098                              | -0.144                             | 1104  |
| 10a            | δ <sup>+</sup> ring                  | -0.040                             | -0.030                             | -0.013                             | 0.042                              | 0.005                              | 936   | 0.040                              | 0.024                              | 0.036                              | -0.044                             | -0.002                             | 918   |
|                |                                      |                                    |                                    |                                    |                                    |                                    |       |                                    |                                    |                                    |                                    |                                    |       |
| 5b             | v <sup>-</sup> (N-C <sub>2</sub> )   | 0.208                              | -0.215                             | 0.100                              | -0.041                             | -0.142                             | 1479  | -0.174                             | 0.187                              | -0.113                             | 0.024                              | 0.207                              | 1471  |
| 7b             | v <sup>-</sup> (N-C <sub>4,5</sub> ) | -0.024                             | 0.221                              | 0.132                              | -0.224                             | 0.075                              | 1338  | -0.238                             | 0.096                              | 0.274                              | -0.106                             | -0.026                             | 1351  |
| 8b             | δ(C <sub>2</sub> -H)                 | 0.105                              | 0.137                              | -0.012                             | -0.051                             | 0.045                              | 1253  | -0.003                             | -0.109                             | -0.059                             | 0.039                              | -0.028                             | 1241  |
| 9b             | δ <sup>-</sup> (C <sub>4,5</sub> -H) | 0.092                              | -0.052                             | 0.156                              | -0.083                             | -0.049                             | 1056  | 0.123                              | -0.043                             | 0.130                              | -0.069                             | -0.063                             | 1057  |
| 10b            | δ <sup>-</sup> ring                  | 0.022                              | 0.014                              | -0.031                             | 0.042                              | 0.014                              | 920   | 0.077                              | 0.036                              | -0.088                             | 0.037                              | -0.009                             | 941   |

<sup>a</sup> Internal coordinate coefficients are given for pairs of bonds related by pseudo 2-fold symmetry analogous to ImH<sub>2</sub><sup>+</sup>:

v<sup>±</sup>(N-C<sub>2</sub>) = (N<sub>1</sub>-C<sub>2</sub> +/- N<sub>3</sub>-C<sub>2</sub>); v<sup>±</sup>(N-C<sub>4,5</sub>) = (N<sub>1</sub>-C<sub>5</sub> +/- N<sub>3</sub>-C<sub>4</sub>); δ<sup>±</sup>(C<sub>4,5</sub>-H) = (C<sub>4</sub>-H +/- C<sub>5</sub>-H); δ<sup>±</sup>(N-H/D) = (C<sub>1</sub>-H/D +/- N<sub>3</sub>-H/D).

**Table S11.** Experimental and computed vibrational frequencies( $\text{cm}^{-1}$ ) for the in-plane imidazole modes of the indicated molecules

| $\nu_i$ | [tren]-Cu-Im-Zn-[tren] |       | [tren]-Cu-ImH |       | [tren]-Zn-ImH |       |
|---------|------------------------|-------|---------------|-------|---------------|-------|
|         | Exp.                   | Calc. | Exp.          | Calc. | Exp.          | Calc. |
| 4a      | 1493                   | 1497  |               | 1568  | 1615          | 1567  |
| 5a      | 1280                   | 1267  | 1449          | 1452  | 1444          | 1450  |
| 6a      |                        |       | 1190          | 1186  | 1189          | 1185  |
| 7a      | 1185                   | 1112  |               | 1133  | 1139          | 1128  |
| 9a      | 1107                   | 1160  |               | 1104  | 1107          | 1103  |
| 10a     | 879                    | 979   |               | 961   | 938           | 956   |
|         |                        |       |               |       |               |       |
| 5b      |                        | 1494  |               | 1517  | 1547          | 1516  |
| 6b      |                        |       |               |       |               |       |
| 7b      | 1337                   | 1328  | 1336          | 1338  | 1334          | 1336  |
| 8b      |                        | 1247  | 1270          | 1269  | 1267          | 1268  |
| 9b      | 1023                   | 1081  |               | 1071  | 1078          | 1070  |
| 10b     | 906                    | 953   |               | 928   | 954           | 928   |

Calculated frequencies of M-N stretching modes:

[tren]-Cu-Im-Zn-[tren]: Cu-N at  $265 \text{ cm}^{-1}$  and Zn-N at  $227 \text{ cm}^{-1}$ .

[tren]-Cu-ImH: Cu-N at  $262 \text{ cm}^{-1}$ .

[tren]-Zn-ImH: Zn-N at  $221 \text{ cm}^{-1}$ .

## References

1. Vaughan, J. D.; Mughrabi, Z.; Wu, E. C. Kinetics of deuteration of imidazole, *Journal of Organic Chemistry* **1970**, *35*, 1141-1145.
2. Fuess, H.; Hohlwein, D.; Mason, S. A. Neutron-diffraction study of L-histidine hydrochloride monohydrate, *Acta Crystallographica Section B-Structural Science* **1977**, *33*, 654-659.
3. McMullan, R. K.; Epstein, J.; Ruble, J. R.; Craven, B. M. Crystal-structure of imidazole at 103-K by neutron-diffraction, *Acta Crystallographica Section B-Structural Science* **1979**, *35*, 688-691.
4. Pulay, P.; Fogarasi, G.; Pang, F.; Boggs, J. E. Systematic abinitio gradient calculation of molecular geometries, force constants, and dipole-moment derivatives, *Journal of the American Chemical Society* **1979**, *101*, 2550-2560.
5. Pulay, P.; Fogarasi, G.; Pongor, G.; Boggs, J. E.; Vargha, A. Combination of theoretical abinitio and experimental information to obtain reliable harmonic force-constants - scaled quantum-mechanical (SQM) force-fields for glyoxal, acrolein, butadiene, formaldehyde, and ethylene, *Journal of the American Chemical Society* **1983**, *105*, 7037-7047.
6. Rauhut, G.; Pulay, P. Transferable scaling factors for density-functional derived vibrational force-fields, *Journal of Physical Chemistry* **1995**, *99*, 3093-3100.
7. Rauhut, G.; Pulay, P. Transferable scaling factors for density-functional derived vibrational force-fields (VOL 99, Pg 3096, 1995), *Journal of Physical Chemistry* **1995**, *99*, 14572-14572.
8. Baker, J.; Jarzecki, A. A.; Pulay, P. Direct scaling of primitive valence force constants: An alternative approach to scaled quantum mechanical force fields, *Journal of Physical Chemistry A* **1998**, *102*, 1412-1424.
9. VanBael, M. K.; Smets, J.; Schone, K.; Houben, L.; McCarthy, W.; Adamowicz, L.; Nowak, M. J.; Maes, G. Matrix-isolation FTIR studies and theoretical calculations of hydrogen-bonded complexes of imidazole. A comparison between experimental results and different calculation methods, *Journal of Physical Chemistry A* **1997**, *101*, 2397-2413.
